# Supplementary material
Source: PubMed Central journal article supplement (PMC5636679)
Supplement: NIHMS899591-supplement-1.pdf [file NIHMS899591-supplement-1.pdf]

## Supplemental Figure 1

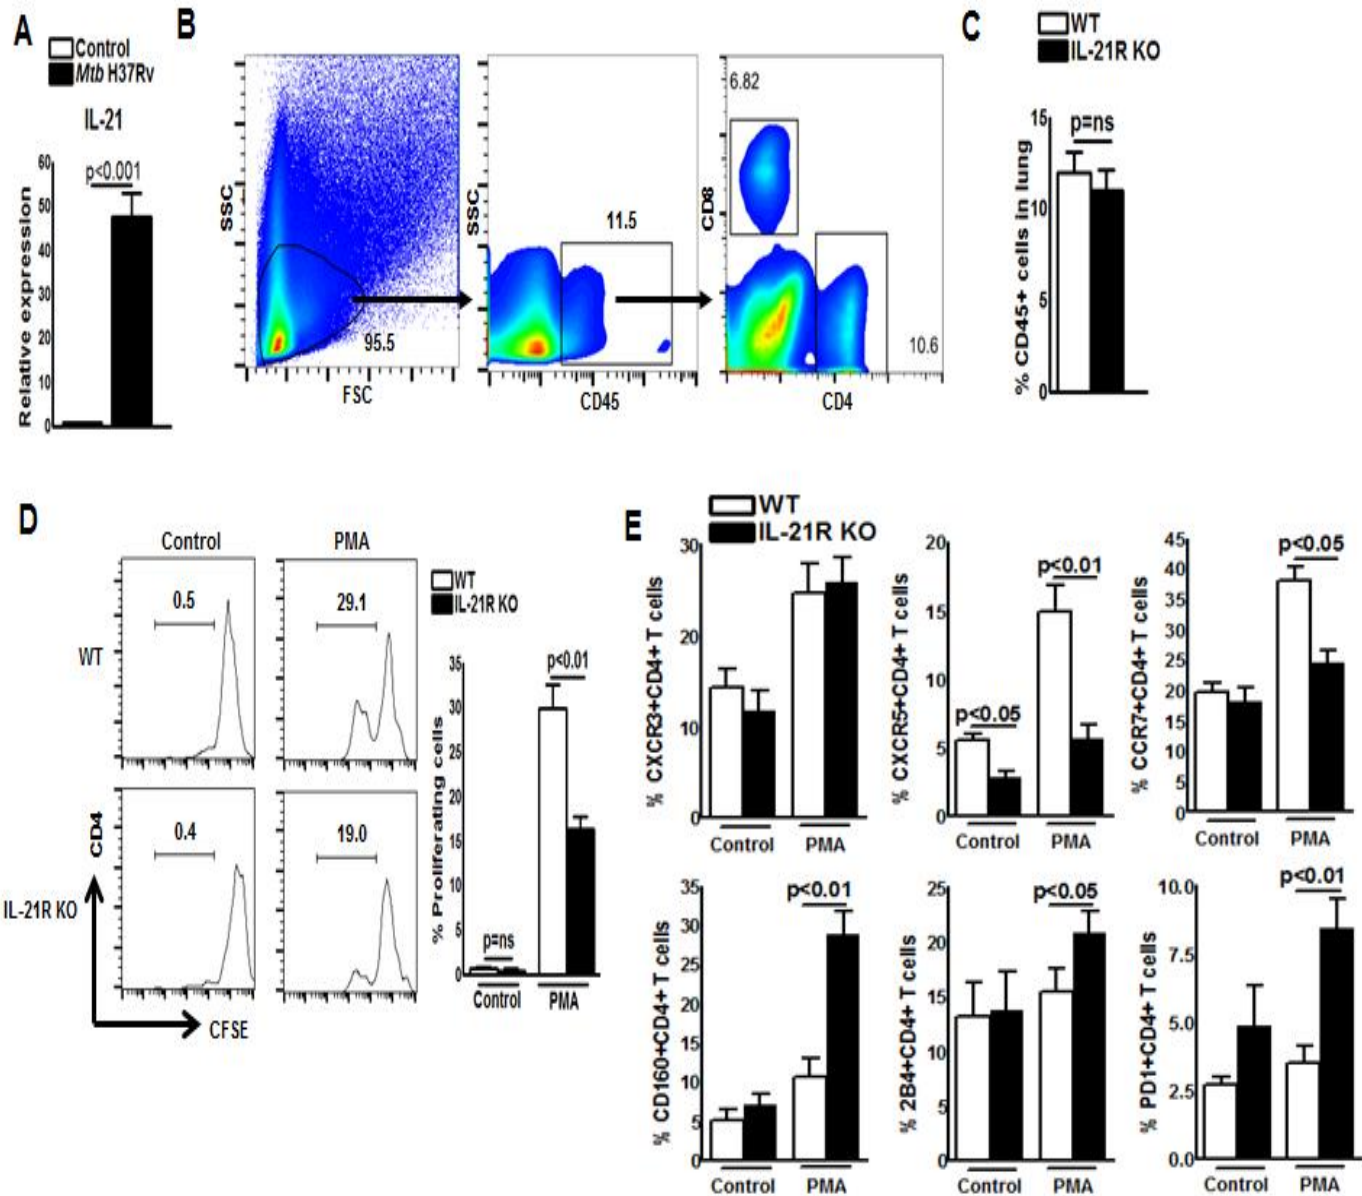

**Supplemental Fig 1. IL-21 during *Mtb* infection.** **A.** WT mice were infected with 50-100 CFU of H37Rv by aerosol. Three months after infection, IL-21 expression in the control and *Mtb* infected mice lungs was quantified by real time PCR. **B.** A representative flow cytometry plot of gating strategy. **C.** WT and IL-21R KO mice lungs were quantified for CD45+ cells by flow cytometry. **IL-21R is essential for effector function of T cells. D and E.** Lung mononuclear cells from WT and IL-21R KO mice (both C57BL/6NJ background) were labelled with CFSE and stimulated with the phorbol 12-myristate 13-acetate (PMA) and Ionomycin (500 ng/ml each). After 72 hours, the percentages of **D.** proliferating CD4+ T cells. **E.** and CD4+ cells that express CD160, 2B4, PD1, CXCR3, CXCR5 and CCR7 were quantified.

## Supplemental Figure 2

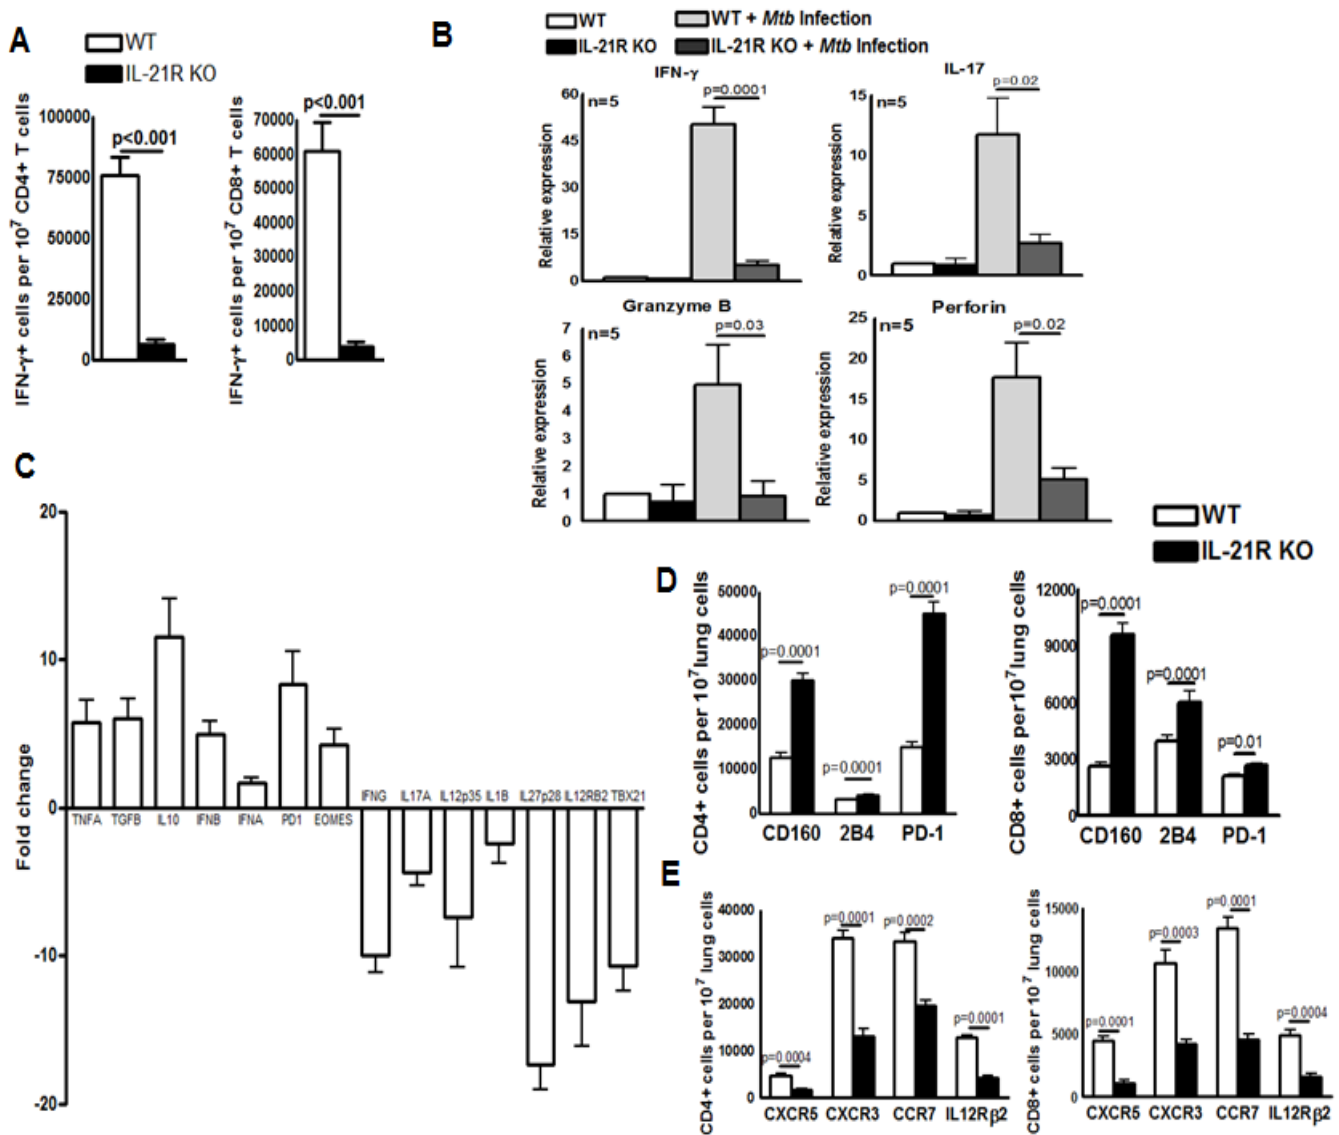

### Supplemental Fig 2. IL-21 is essential for optimal T-cell responses during *Mtb* infection.

WT and IL-21R KO mice (both C57BL/6NJ background) were infected with 50-100 CFU of H37Rv by aerosol. Three months after infection, **A**. The number of IFN- $\gamma$ + CD4+ and CD8+ cells in the spleen was measured by flow cytometry. **B and C**. Expression of various cytokines and transcription factors in the lung mRNA was determined by real-time PCR. **D and E**. Percentage of CD160, 2B4, PD1, CXCR3, CXCR5 and CCR7 by lung CD4 and CD8 T cells was determined by flow cytometry. Data are representative of two independent experiments. Three mice per group were used in each independent experiment. Mean values and SE are shown.

### Supplemental Figure 3

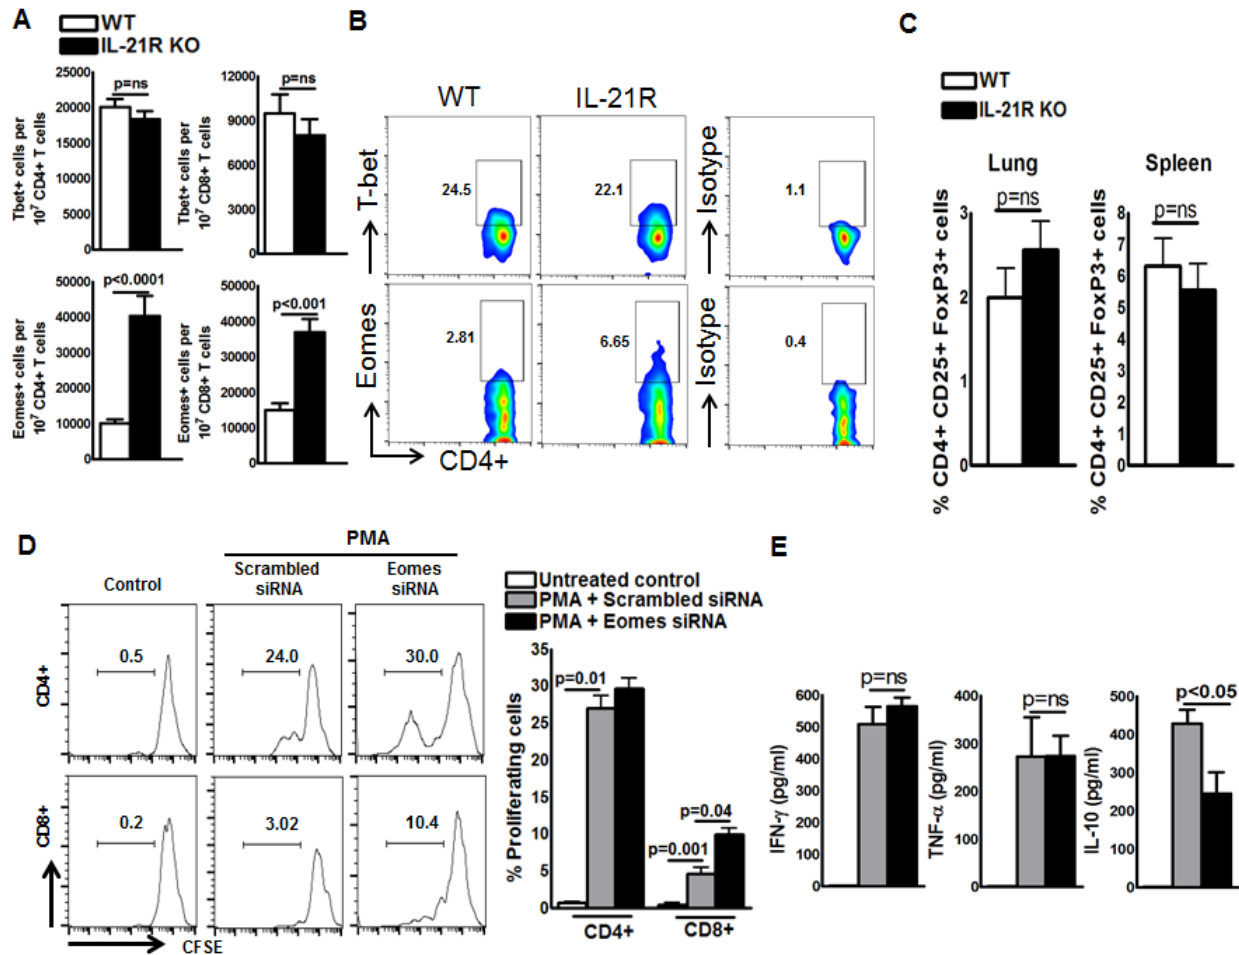

**Supplemental Fig. 3 Increased Eomes expression by T-cells of *Mtb* infected IL-21R KO mice.** **A-B.** WT and IL-21R KO mice (both C57BL/6NJ background) were infected with 50-100 CFU of H37Rv by aerosol. Three months after infection in lungs **A.** The frequency of T cells expressing T-bet and Eomes. **B.** A representative flow cytometry plot. **IL-21 does not affect FoxP3+ T regs during *Mtb* infection.** **C.** The frequency of CD4+ T cells expressing CD25+FoxP3+ in the lung and spleen was determined by flow cytometry. **D and E. Effect of Eomes siRNA on PMA and Ionomycin stimulated WT mice lung CD4+ T-cell responses.** Lung mononuclear cells from WT mice were labelled with CFSE and stimulated with PMA and Ionomycin (500 ng/ml each) in the presence or absence siRNA to Eomes or scrambled siRNA. After 72 hours, supernatants were collected and flow cytometry was performed on cells to determine **D.** T cell proliferation. **E.** IFN- $\gamma$ , TNF- $\alpha$  and IL-10 levels in culture supernatants were determined by ELISA. Data are representative of three independent experiments. Pooled cells from two mice were used in each independent experiment. Mean values, p values and SEs are shown.

**Supplemental Table I: List of primers used in this study**

| S.No | Gene name        | Mouse Primer Sequences                                                                   |
|------|------------------|------------------------------------------------------------------------------------------|
| 1.   | IFN- $\gamma$    | Forward: TCA AGT GGC ATA GAT GTG GAA GAA<br>Reverse: TGG CTC TGC AGG ATT TTC CAT G       |
| 2.   | TNF- $\alpha$    | Forward: CAT CTT CTC AAA ATT CGA GTG ACA A<br>Reverse: TGG GAG TAG ACA AGG TAC AAC CC    |
| 3.   | IL-17            | Forward: CTC CAT AAG GCC CTC AGA CTA C<br>Reverse: AGC TTT CCC TCC GCA TTG ACA CAG       |
| 4    | Eomes            | Forward: CCA CTG GAT GAG GCA GGA GAT T<br>Reverse: GTC CTC TGT CAC TTC CAC GAT G         |
| 5    | T-bet            | Forward: CCA CCT GTT GTG GTC CAA GTT C<br>Reverse: CCA CAA ACA TCC TGT AAT GGC TTG       |
| 6    | IL-12R $\beta$ 2 | Forward: TGT GGG GGT GGA GAT CTC AGT<br>Reverse: TCT CCT TCC TGG ACA CAT GA              |
| 7    | IL-1 $\beta$     | Forward: CAA CCA ACA AGT GAT ATT CTC CAT G<br>Reverse: GAT CCA CAC TCT CCA GCT           |
| 8    | IL-27p28         | Forward: TGT CCA CAG CTT TGC TGA AT<br>Reverse: CCG AAG TGT GGT AGC GAG G                |
| 9    | IL-12p35         | Forward: CTT AGC CAG TCC CGA AAC CT<br>Reverse: TTG GTC CCG TGT GAT GTC T                |
| 10   | TGF- $\beta$     | Forward: GGA TAC CAA CTA TTG CTT CAG CTC C<br>Reverse: AGG CTC CAA TAT TAG GGG CAG GGT C |
| 11   | IL-10            | Forward: GGT TGC CAA GCC TTA TCG GA<br>Reverse: ACC TGC TCC ACT GCC TTG CT               |
| 12   | IFN- $\alpha$    | Forward: GCT AGG CTC TGT GCT TTC CT<br>Reverse: TCC TGC GGG AAT CCA AAG TC               |
| 13   | IFN- $\beta$     | Forward: CGT GGG AGA TGT CCT CAA CT<br>Reverse: AGA TCT CTG CTC GGA CCA CC               |
| 14   | Granzyme B       | Forward: ATC CTG CTC TGA TTA CCC ATC GT<br>Reverse: ATG GAT TAT GAA GCC AGT CTT TGC      |
| 15   | Perforin         | Forward: AAT ATC AAT AAC GAC TGG CGT GT<br>Reverse: CAT GTT TGC CTC TGG CCT A            |
| 16   | PD1              | Forward: ACC CTG GTC ATT CAC TTG G<br>Reverse: CAT TTG CTC CCT CTG ACA CTG               |
| 17   | IL-21            | Forward: GCC TCC TGA TTA GAC TTC GTC AC<br>Reverse: CAG GCA AAA GCT GCA TGC TCA C        |
| 18   | $\beta$ -Actin   | Forward: CTC TGG CTC CTA GCA CCA TGA AGA<br>Reverse: GTA AAA GAC AGC TCA GTA ACA GTC CG  |
